# Supplementary material for: Antimicrobial Resistance and Biofilm Formation of Staphylococcus aureus Isolates from Febrile Cases: Findings from a Rural Cohort of Odisha, India
Source: PubMed Central journal article supplement — Pol J Microbiol. 2023 Jun 14;72(2):209–14. doi: 10.33073/pjm-2023-005 (PMC10266288; doi:10.33073/pjm-2023-005), 2023-06-14
Supplement: pjm-2023-005_sm.pdf [file pjm-2023-005_sm.pdf]

Supplementary materials for the article:  
Dash P. et al. Antimicrobial Resistance and Biofilm Formation of *Staphylococcus aureus*  
Isolates from Febrile Cases: Findings from a Rural Cohort of Odisha, India.  
Pol J Microbiol. 2023, Vol. 72, No 2, 209–214

Table SI  
Details of clinical data of patients included in the study.

| Age (Years) | Gender | Fever history | Antibiotic history | Antibiotic                                       | Organism isolated            |
|-------------|--------|---------------|--------------------|--------------------------------------------------|------------------------------|
| 24          | Male   | Fever 3 days  | No                 | -                                                | <i>Staphylococcus aureus</i> |
| 40          | Female | Fever 6 days  | No                 | -                                                | <i>Staphylococcus aureus</i> |
| 56          | Female | Fever 7 days  | No                 | -                                                | <i>Staphylococcus aureus</i> |
| 13          | Female | Fever 6 days  | Antibiotic taken   | azithromycin, amoxicillin, potassium clavulanate | <i>Staphylococcus aureus</i> |
| 42          | Female | Fever 1 day   | No                 | -                                                | <i>Staphylococcus aureus</i> |
| 35          | Female | Fever 1 day   | No                 | -                                                | <i>Staphylococcus aureus</i> |
| 51          | Female | Fever 3 days  | Antibiotic taken   | ciprofloxacin                                    | <i>Staphylococcus aureus</i> |
| 45          | Female | Fever 4 days  | No                 | -                                                | <i>Staphylococcus aureus</i> |
| 26          | Female | Fever 4 days  | Antibiotic taken   | Not known                                        | <i>Staphylococcus aureus</i> |
| 50          | Female | Fever 4 days  | No                 | -                                                | <i>Staphylococcus aureus</i> |
| 50          | Male   | Fever 5 days  | Antibiotic taken   | azithromycin                                     | <i>Staphylococcus aureus</i> |
| 43          | Male   | Fever 5 days  | No                 | -                                                | <i>Staphylococcus aureus</i> |
| 35          | Female | Fever 2 days  | Antibiotic taken   | azithromycin                                     | <i>Staphylococcus aureus</i> |
| 27          | Female | Fever 4 days  | Antibiotic taken   | azithromycin                                     | <i>Staphylococcus aureus</i> |
| 24          | Female | Fever 3 days  | Antibiotic taken   | azithromycin, cefixime                           | <i>Staphylococcus aureus</i> |
| 20          | Male   | Fever 4 days  | Antibiotic taken   | ceftriaxone                                      | <i>Staphylococcus aureus</i> |
| 50          | Female | Fever 3 days  | No                 | -                                                | <i>Staphylococcus aureus</i> |

| Age (Years) | Gender | Fever history | Antibiotic history | Antibiotic                                       | Organism isolated            |
|-------------|--------|---------------|--------------------|--------------------------------------------------|------------------------------|
| 55          | Male   | Fever 2 days  | No                 | -                                                | <i>Staphylococcus aureus</i> |
| 70          | Female | Fever 7 days  | Antibiotic taken   | azithromycin                                     | <i>Staphylococcus aureus</i> |
| 60          | Female | Fever 2 days  | Antibiotic taken   | Not known                                        | <i>Staphylococcus aureus</i> |
| 70          | Male   | Fever 5 days  | No                 | -                                                | <i>Staphylococcus aureus</i> |
| 35          | Female | Fever 3 days  | Antibiotic taken   | azithromycin, amoxicillin, potassium clavulanate | <i>Staphylococcus aureus</i> |
| 6           | Female | Fever 4 days  | No                 | -                                                | <i>Staphylococcus aureus</i> |
| 13          | Male   | Fever 2 days  | No                 | -                                                | <i>Staphylococcus aureus</i> |
| 75          | Male   | Fever 2 days  | No                 | -                                                | <i>Staphylococcus aureus</i> |
| 59          | Male   | Fever 2 days  | No                 | -                                                | <i>Staphylococcus aureus</i> |
| 60          | Male   | Fever 2 days  | Antibiotic taken   | amoxicillin                                      | <i>Staphylococcus aureus</i> |
| 10          | Male   | Fever 1 day   | Antibiotic taken   | azithromycin                                     | <i>Staphylococcus aureus</i> |
| 73          | Male   | Fever 4 days  | No                 | -                                                | <i>Staphylococcus aureus</i> |
| 31          | Male   | Fever 2 days  | Antibiotic taken   | ciprofloxacin, azithromycin                      | <i>Staphylococcus aureus</i> |
| 72          | Male   | Fever 2 days  | Antibiotic taken   | ceftriaxone, ofloxacin                           | <i>Staphylococcus aureus</i> |
| 15          | Female | Fever 5 days  | No                 | -                                                | <i>Staphylococcus aureus</i> |
| 30          | Female | Fever 4 days  | Antibiotic taken   | azithromycin, ceftriaxone                        | <i>Staphylococcus aureus</i> |
| 45          | Male   | Fever 4 days  | Antibiotic taken   | ceftriaxone                                      | <i>Staphylococcus aureus</i> |
| 60          | Female | Fever 7 days  | Antibiotic taken   | ceftriaxone, sulbactam                           | <i>Staphylococcus aureus</i> |
| 42          | Male   | Fever 4 days  | Antibiotic taken   | ceftriaxone, sulbactam                           | <i>Staphylococcus aureus</i> |
| 52          | Male   | Fever 2 days  | Antibiotic taken   | azithromycin                                     | <i>Staphylococcus aureus</i> |
| 40          | Male   | Fever 2 days  | No                 | -                                                | <i>Staphylococcus aureus</i> |
| 11          | Female | Fever 2 days  | No                 | -                                                | <i>Staphylococcus aureus</i> |

| Age (Years) | Gender | Fever history | Antibiotic history | Antibiotic              | Organism isolated            |
|-------------|--------|---------------|--------------------|-------------------------|------------------------------|
| 45          | Female | Fever 8 days  | Antibiotic taken   | azithromycin            | <i>Staphylococcus aureus</i> |
| 63          | Male   | Fever 3 days  | Antibiotic taken   | cefoperazone, sulbactam | <i>Staphylococcus aureus</i> |
| 51          | Male   | Fever 3 days  | No                 | -                       | <i>Staphylococcus aureus</i> |
| 13          | Male   | Fever 2 days  | No                 | -                       | <i>Staphylococcus aureus</i> |
| 43          | Male   | Fever 1 day   | No                 | -                       | <i>Staphylococcus aureus</i> |
| 33          | Female | Fever 3 days  | No                 | -                       | <i>Staphylococcus aureus</i> |
| 50          | Female | Fever 4 days  | Antibiotic taken   | Not known               | <i>Staphylococcus aureus</i> |
| 54          | Female | Fever 2 days  | Antibiotic taken   | ceftriaxone             | <i>Staphylococcus aureus</i> |
| 41          | Male   | Fever 2 days  | No                 | -                       | <i>Staphylococcus aureus</i> |
| 47          | Female | Fever 3 days  | No                 | -                       | <i>Staphylococcus aureus</i> |
| 46          | Male   | Fever 1 day   | No                 | -                       | <i>Staphylococcus aureus</i> |
| 52          | Male   | Fever 6 days  | Antibiotic taken   | ceftriaxone             | <i>Staphylococcus aureus</i> |
| 18          | Male   | Fever 3 days  | Antibiotic taken   | Not known               | <i>Staphylococcus aureus</i> |
| 45          | Male   | Fever 1 day   | Antibiotic taken   | azithromycin            | <i>Staphylococcus aureus</i> |
| 40          | Female | Fever 3 days  | No                 | -                       | <i>Staphylococcus aureus</i> |
| 12          | Male   | Fever 3 days  | No                 | -                       | <i>Staphylococcus aureus</i> |
| 45          | Male   | Fever 3 days  | Antibiotic taken   | azithromycin            | <i>Staphylococcus aureus</i> |
| 38          | Male   | Fever 3 days  | Antibiotic taken   | Not known               | <i>Staphylococcus aureus</i> |
| 47          | Male   | Fever 2 days  | Antibiotic taken   | cefixime                | <i>Staphylococcus aureus</i> |
| 42          | Male   | Fever 5 days  | No                 | -                       | <i>Staphylococcus aureus</i> |
| 24          | Female | Fever 2 days  | No                 | -                       | <i>Staphylococcus aureus</i> |
| 26          | Female | Fever 5 days  | Antibiotic taken   | azithromycin            | <i>Staphylococcus aureus</i> |
| 52          | Male   | Fever 2 days  | No                 | -                       | <i>Staphylococcus aureus</i> |

| Age (Years) | Gender | Fever history | Antibiotic history | Antibiotic  | Organism isolated            |
|-------------|--------|---------------|--------------------|-------------|------------------------------|
| 80          | Male   | Fever 3 days  | No                 | -           | <i>Staphylococcus aureus</i> |
| 27          | Female | Fever 4 days  | No                 | -           | <i>Staphylococcus aureus</i> |
| 48          | Male   | Fever 3 days  | Antibiotic taken   | cefpodoxime | <i>Staphylococcus aureus</i> |
| 34          | Female | Fever 3 days  | No                 | -           | <i>Staphylococcus aureus</i> |
| 69          | Male   | Fever 1 day   | No                 | -           | <i>Staphylococcus aureus</i> |
| 29          | Female | Fever 3 days  | No                 | -           | <i>Staphylococcus aureus</i> |
| 3.5         | Male   | Fever 3 days  | Antibiotic taken   | cefpodoxime | <i>Staphylococcus aureus</i> |
| 29          | Male   | Fever 1 day   | No                 | -           | <i>Staphylococcus aureus</i> |
| 30          | Female | Fever 5 days  | No                 | -           | <i>Staphylococcus aureus</i> |
| 4           | Male   | Not sure      | No                 | -           | <i>Staphylococcus aureus</i> |
| 23          | Female | Fever 5 days  | Antibiotic taken   | Not known   | <i>Staphylococcus aureus</i> |

Table SII

Descriptive analysis of demographic and clinical data of (A) patients included in the study and (B) patients who were found positive for *Staphylococcus aureus aureus*.

| Table A                     | Total participants included in the study n = 718 |                  |
|-----------------------------|--------------------------------------------------|------------------|
| Age in years                | Median (IQR)                                     | Range (min, max) |
|                             | 35 (28)                                          | 94.89 (0.11, 95) |
| Gender                      | Male (n (%))                                     | Female (n (%))   |
|                             | 397 (55.29)                                      | 321 (44.71)      |
| Average day of having fever | Median (IQR)                                     | Range (min, max) |
|                             | 3 (2)                                            | 29 (1, 30)       |

| Table B                   | Samples positive for <i>S. typhi</i> , n = 73 |                  |
|---------------------------|-----------------------------------------------|------------------|
| Age in years              | Median (IQR)                                  | Range (min, max) |
|                           | 42 (24)                                       | 76.5 (4, 80)     |
| Gender                    | Male (n (%))                                  | Female (n (%))   |
|                           | 39 (53.42)                                    | 34 (46.58)       |
| History of antibiotic use | Yes (n (%))                                   | No (n (%))       |
|                           | 34 (46.58)                                    | 39 (53.42)       |
| Biofilm formation status  | Yes (n (%))                                   | No (n (%))       |
|                           | 73 (n (%))                                    | 0                |
| Resistance to antibiotic  | Yes (n (%))                                   | No (n (%))       |
|                           | 72 (98.63)                                    | 1 (1.37)         |

IQR – interquartile range
